# Supplementary material for: Combined Plasma Syndecan-1 and Renal Resistive Index as Early Predictiors of Sepsis-Associated Acute Kidney Injury: a prospective observational study
Source: Research Square preprint supplement (doi:10.21203/rs.3.rs-7083437/v1), 2025-07-29
Supplement: Supplementary file 1 [file ac4bc03e794ec63b2dcc8f4a.docx]

**Table S1 Demographic and Clinical characteristics for patients with sepsis**

| Variables | Overall  (N = 80) | Sepsis and non-AKI  (N = 39) | Sepsis and AKI  (N = 41) | *P* |
| --- | --- | --- | --- | --- |
| Age | 65 (56, 72) | 66 (59, 72) | 64 (49, 70) | 0.488 |
| Gender |  |  |  |  |
| Female | 27 (33.8) | 18 (46.2) | 9 (22.0) | 0.040 |
| Male | 53 (66.2) | 21 (53.8) | 32 (78.0) |  |
| ICU Severity Scores |  |  |  |  |
| APACHE II | 17 (11.75, 23.25) | 15 (10.00, 19.50) | 19 (14.00, 24.00) | 0.040 |
| SOFA | 5 (3.75, 8.00) | 5 (3.00, 7.50) | 7 (4.00, 9.00) | 0.039 |
| Co-morbidities |  |  |  |  |
| Sepsis shock |  |  |  |  |
| Yes | 18 (22.5) | 6 (15.4) | 12 (29.3) | 0.223 |
| No | 62 (77.5) | 33 (84.6) | 29 (70.7) |  |
| Diabetes |  |  |  |  |
| Yes | 22 (27.5) | 9 (23.1) | 13 (31.7) | 0.539 |
| No | 58 (72.5) | 30 (76.9) | 28 (68.3) |  |
| Hypertension |  |  |  |  |
| Yes | 28 (35.0) | 12 (30.8) | 16 (39.0) | 0.590 |
| No | 52 (65.0) | 27 (69.2) | 25 (61.0) |  |
| Pneumonia |  |  |  |  |
| Yes | 44 (55.0) | 21 (53.8) | 23 (56.1) | 1.000 |
| No | 36 (45.0) | 18 (46.2) | 18 (43.9) |  |
| Perforated Peptic Ulcer |  |  |  |  |
| Yes | 17 (21.2) | 7 (17.9) | 10 (24.4) | 0.667 |
| No | 63 (78.8) | 32 (82.1) | 31 (75.6) |  |
| Atherosclerosis |  |  |  |  |
| Yes | 13 (16.2) | 5 (12.8) | 8 (19.5) | 0.612 |
| No | 67 (83.8) | 34 (87.2) | 33 (80.5) |  |
| Congestive Heart Failure |  |  |  |  |
| Yes | 13 (16.2) | 3 (7.7) | 10 (24.4) | 0.085 |
| No | 67 (83.8) | 36 (92.3) | 31 (75.6) |  |
| Vital signs |  |  |  |  |
| MAP, mmHg | 83(73.75, 96.25) | 83 (76.00, 94.00) | 85 (73.00, 97.00) | 0.870 |
| Heart Rate, beats/min | 96.75 ± 26.52 | 95.33 ± 22.76 | 98.10 ± 29.89 | 0.644 |
| Oxygenation Index, mmHg | 255.00 (187.25, 320.00) | 231.00 (181.50, 265.50) | 290.00 (193.00, 408.00) | 0.019 |
| Laboratory parameters |  |  |  |  |
| Serum Glucose, mg/dL | 8.35 (6.70, 10.75) | 8.90 (7.20, 11.00) | 8.30 (6.50, 10.50) | 0.634 |
| Lactic Acid, mmol/L | 1.50 (1.00, 2.40) | 1.40 (0.85, 1.90) | 1.70 (1.20, 2.70) | 0.024 |
| Creatinine, μmol/L | 102.45 (66.00, 158.12) | 66.70 (59.25, 92.35) | 158.10 (125.20, 195.00) | <0.001 |
| NT-proBNP , pg/mL | 687.90 (315.58, 1781.25) | 494.20 (256.70, 834.15) | 1207.00 (500.10, 4930.00) | 0.001 |
| Albumin, umol/L | 29.68±6.24 | 30.43±5.89 | 28.97±6.55 | 0.297 |
| Total Bilirubin, umol/L | 15.50 (9.88, 24.30) | 17.40 (11.10, 30.70) | 14.90 (9.00, 20.70) | 0.073 |
| BUN, mmol/L | 8.35 (6.47, 11.43) | 6.50 (4.40, 8.35) | 10.50 (8.30, 17.30) | <0.001 |
| Cystatin C, mg/L | 1.20 (0.98, 1.70) | 1.00 (0.80, 1.10) | 1.60 (1.20, 2.10) | <0.001 |
| Homocysteine, μmol/L | 11.80 (7.00, 13.95) | 9.50 (6.70, 13.00) | 13.20 (9.80, 16.30) | 0.005 |
| Prothrombin Time, s | 13.10 (12.20, 14.43) | 13.00 (12.35, 13.65) | 13.30 (12.00, 16.00) | 0.244 |
| APTT, s | 29.20 (26.73, 34.05) | 29.00 (26.75, 33.90) | 29.40 (26.80, 34.30) | 0.874 |
| Serum D-Dimer, mg/L | 4815.00 (1607.50, 8900.00) | 4800.00 (1450.00, 9460.00) | 5090.00 (1660.00, 8570.00) | 0.935 |
| White Blood Cell, 109/L | 11.77±5.86 | 11.78±5.57 | 11.75±6.19 | 0.983 |
| Lymphocytes, 109/L | 0.80 (0.60, 1.20) | 0.80 (0.60, 1.05) | 0.80 (0.60, 1.30) | 0.750 |
| Platelets, 109/L | 183.50 (137.50, 255.50) | 202.00 (149.50, 235.00) | 180.00 (128.00, 266.00) | 0.751 |
| Serum Procalcitonin | 2.34 (0.37, 14.80) | 1.06 (0.20, 5.42) | 6.50 (0.71, 27.50) | 0.003 |
| C-Reactive Protein, mg/L | 69.80 (28.87, 113.25) | 62.00 (30.45, 113.50) | 71.70 (28.90, 113.00) | 0.784 |
| IL-6, pg/mL | 547.50 (109.25, 1877.25) | 577.00 (94.60, 1095.50) | 518.00 (118.00, 3592.00) | 0.508 |
| Serum Amyloid A, mg/L | 141 (81.32, 150.00) | 141 (92.65, 150.00) | 141(92.65, 150.00) | 0.683 |
| Norepinephrine |  |  |  |  |
| Yes | 27 (33.8) | 9 (23.1) | 18 (43.9) | 0.083 |
| No | 53 (66.2) | 30 (76.9) | 23 (56.1) |  |
| Dopamine |  |  |  |  |
| Yes | 18 (22.5) | 11 (28.2) | 7 (17.1) | 0.355 |
| No | 62 (77.5) | 28 (71.8) | 34 (82.9) |  |
| CRRT |  |  |  |  |
| Yes | 9 (11.2) | 0 (0.0) | 9 (22.0) | 0.011 |
| No | 71 (88.8) | 39 (100.0) | 32 (78.0) |  |
| Mechanical Ventilation |  |  |  |  |
| Yes | 46 (57.5) | 21 (53.8) | 25 (61.0) | 0.676 |
| No | 34 (42.5) | 18 (46.2) | 16 (39.0) |  |
| Hospital LOS, days | 16.60（10.52, 30.93) | 15.70 (9.15, 27.25) | 17.60 (11.80, 32.50) | 0.310 |
| ICU LOS, days | 4.85 (2.80, 11.75) | 5.00 (2.85, 8.55) | 4.80 (2.70, 12.30) | 0.851 |
| RRI | 0.65 ± 0.08 | 0.60 ± 0.06 | 0.69 ± 0.08 | <0.001 |
| Syndecan-1, ng/ml | 90.25（65.95,190.73） | 73.67（54.59,109.95） | 109.95（73.67,221.40） | 0.006 |

Continuous variables were expressed as mean±standard deviation, or median (interquartile range, IQR), as appropriate.Categorical variables were presented as n (%).

**Abbreviations：**AKI, Acute Kidney Injury; APACHE, Acute Physiology and Chronic Health Evaluation; SOFA, Sepsis-related Organ Failure Assessment score; MAP, Mean arterial pressure; NT-proBNP, N-terminal pro-B-type natriuretic peptide; BUN, Blood Urea Nitrogen; APTT, Activated Partial Thromboplastin Time; CRRT, Continuous Renal Replacement Therapy; LOS, length of stay; RRI, Renal Resistive Index.

**Table S2 Comparison characteristics and biomarker levels in patients with and without septic shock**

| Variables | Overall (N = 80) | Non-septic shock  (N = 62) | Septic shock  (N = 18) | *P* |
| --- | --- | --- | --- | --- |
| Age | 65 (56, 72) | 65 (56, 72) | 66 (56, 70) | 0.809 |
| Gender |  |  |  |  |
| Female | 27 (33.8) | 19 (30.6) | 8 (44.4) | 0.420 |
| Male | 53 (66.2) | 43 (69.4) | 10 (55.6) |  |
| ICU Severity Scores |  |  |  |  |
| APACHE II | 17.00 (11.75, 23.25) | 17.00 (12.00, 21.00) | 19.50 (11.50, 25.50) | 0.464 |
| SOFA | 5.00 (3.75, 8.00) | 5.00 (3.00, 8.00) | 5.50 (5.00, 7.00) | 0.194 |
| Co-morbidities |  |  |  |  |
| AKI |  |  |  |  |
| Yes | 41 (51.2) | 29 (46.8) | 12 (66.7) | 0.223 |
| No | 39 (48.8) | 33 (53.2) | 6 (33.3) |  |
| AKI Stage |  |  |  |  |
| Yes | 22 (27.5) | 17 (27.4) | 5 (27.8) | 0.214 |
| No | 39 (48.8) | 33 (53.2) | 6 (33.3) |  |
| Diabetes |  |  |  |  |
| Yes | 58 (72.5) | 43 (69.4) | 15 (83.3) | 0.385 |
| No | 22 (27.5) | 19 (30.6) | 3 (16.7) |  |
| Hypertension |  |  |  |  |
| Yes | 28 (35.0) | 25 (40.3) | 3 (16.7) | 0.116 |
| No | 52 (65.0) | 37 (59.7) | 15 (83.3) |  |
| Pneumonia |  |  |  |  |
| Yes | 44 (55.0) | 34 (54.8) | 10 (55.6) | 1.000 |
| No | 36 (45.0) | 28 (45.2) | 8 (44.4) |  |
| Perforated Peptic Ulcer |  |  |  |  |
| Yes | 17 (21.2) | 12 (19.4) | 5 (27.8) | 0.659 |
| No | 63 (78.8) | 50 (80.6) | 13 (72.2) |  |
| Atherosclerosis |  |  |  |  |
| Yes | 13 (16.2) | 12 (19.4) | 1 (5.6) | 0.301 |
| No | 67 (83.8) | 50 (80.6) | 17 (94.4) |  |
| Congestive Heart Failure |  |  |  |  |
| Yes | 13 (16.2) | 5 (8.1) | 8 (44.4) | 0.001 |
| No | 67 (83.8) | 57 (91.9) | 10 (55.6) |  |
| Vital signs |  |  |  |  |
| MAP, mmHg | 83.00 (73.75, 96.25) | 85.00 (75.50, 99.00) | 80.50 (70.75, 90.75) | 0.112 |
| Heart Rate, beats/min | 96.75±26.52 | 95.52±27.35 | 101.00±23.66 | 0.443 |
| Oxygenation Index, mmHg | 255 (187.25, 320.00) | 250 (185.75, 304.75) | 275 (198.00, 366.50) | 0.454 |
| Laboratory parameters |  |  |  |  |
| Serum Glucose, mg/dL | 8.30 (6.68, 10.75) | 8.20 (6.43, 10.50) | 9.40 (7.58, 12.38) | 0.112 |
| Lactic Acid, mmol/L | 1.50 (1.00, 2.40) | 1.50 (0.92, 2.20) | 1.80 (1.35, 2.63) | 0.144 |
| Creatinine, μmol/L | 102.45 (66.00, 158.12) | 102.45 (63.30, 157.67) | 101.80 (69.07, 154.62) | 0.991 |
| NT-proBNP , pg/mL | 687.90 (315.58, 1781.25) | 653.15 (287.75, 1581.00) | 786.10 (431.92, 4133.50) | 0.276 |
| Albumin, umol/L | 29.68±6.24 | 30.68±6.12 | 26.26±5.53 | 0.007 |
| Total Bilirubin, umol/L | 15.50 (9.88, 24.30) | 16.10 (11.05, 24.53) | 12.95 (7.95, 22.28) | 0.261 |
| BUN, mmol/L | 8.35 (6.47, 11.43) | 8.30 (5.85, 12.13) | 8.75 (7.08, 9.82) | <0.931 |
| Cystatin C, mg/L | 1.20 (0.98, 1.70) | 1.25 (0.90, 1.70) | 1.20 (1.00, 1.60) | <0.822 |
| Homocysteine, μmol/L | 11.80 (7.00, 13.95) | 11.90 (7.75, 14.05) | 11.15 (6.18, 12.82) | 0.372 |
| Prothrombin Time, s | 13.10 (12.20, 14.43) | 13.00 (12.03, 13.70) | 14.20 (13.00, 15.90) | 0.012 |
| APTT, s | 29.20 (26.73, 34.05) | 29.00 (25.92, 33.60) | 33.10 (28.90, 35.80) | 0.029 |
| Serum D-Dimer, mg/L | 4815.00 (1607.50, 8900.00) | 4815.00 (1582.50, 9275.00) | 4465.00 (2057.50, 6982.50) | 0.945 |
| White Blood Cell, 109/L | 11.77±5.86 | 12.25±5.40 | 10.09±7.13 | 0.170 |
| Lymphocytes, 109/L | 0.80 (0.60, 1.20) | 0.80 (0.60, 1.10) | 0.85 (0.60, 1.37) | 0.795 |
| Platelets, 109/L | 183.50 (137.50, 255.50) | 185.50 (146.25, 253.25) | 182.00 (132.25, 246.75) | 0.954 |
| Serum Procalcitonin | 2.34 (0.37, 14.80) | 1.15 (0.28, 7.13) | 27.00 (4.03, 48.38) | <0.001 |
| C-Reactive Protein, mg/L | 69.80 (28.87, 113.25) | 58.75 (21.35, 107.30) | 96.15 (71.33, 136.32) | 0.011 |
| IL-6, pg/mL | 547.50 (109.25, 1877.25) | 219.50 (89.40, 1162.75) | 2702.00 (612.38, 4000.00) | 0.002 |
| Serum Amyloid A, mg/L | 141.00 (81.32, 150.00) | 141.00 (67.50, 150.00) | 150.00 (93.22, 150.00) | 0.310 |
| Norepinephrine |  |  |  |  |
| Yes | 27 (33.8) | 13 (21.0) | 14 (77.8) | <0.001 |
| No | 53 (66.2) | 49 (79.0) | 4 (22.2) |  |
| Dopamine |  |  |  |  |
| Yes | 18 (22.5) | 14 (22.6) | 4 (22.2) | 1.000 |
| No | 62 (77.5) | 48 (77.4) | 14 (77.8) |  |
| CRRT |  |  |  |  |
| Yes | 9 (11.2) | 5 (8.1) | 4 (22.2) | 0.211 |
| No | 71 (88.8) | 57 (91.9) | 14 (77.8) |  |
| Mechanical Ventilation |  |  |  |  |
| Yes | 46 (57.5) | 33 (53.2) | 13 (72.2) | 0.244 |
| No | 34 (42.5) | 29 (46.8) | 5 (27.8) |  |
| Hospital LOS, days | 16.60 (10.52, 30.93) | 15.00 (9.93, 30.32) | 23.40 (12.82, 32.35) | 0.156 |
| ICU LOS, days | 4.85 (2.80, 11.75) | 4.80 (2.73, 10.35) | 5.75 (3.42, 12.15) | 0.348 |
| RRI | 0.65±0.08 | 0.64±0.08 | 0.66±0.09 | 0.357 |
| Syndecan-1, ng/ml | 90.25（65.95,190.73） | 85.71（60.34,143.94） | 126.61（77.72,300.41） | 0.039 |

Continuous variables were expressed as mean±standard deviation, or median (interquartile range, IQR), as appropriate.Categorical variables were presented as n (%).

**Abbreviations：**AKI, Acute Kidney Injury; APACHE, Acute Physiology and Chronic Health Evaluation; SOFA, Sepsis-related Organ Failure Assessment score; MAP, Mean arterial pressure; NT-proBNP, N-terminal pro-B-type natriuretic peptide; BUN, Blood Urea Nitrogen; APTT, Activated Partial Thromboplastin Time; CRRT, Continuous Renal Replacement Therapy; LOS, length of stay; RRI, Renal Resistive Index.
